# Supplementary material for: Rapid decomposition and visualisation of protein–ligand binding free energies by residue and by water
Source: Royal Society of Chemistry journal article supplement (doi:10.1039/c3fd00125c), 2014-01-01
Supplement: c3fd00125c1.pdf [file c3fd00125c1.pdf]

## SUPPORTING INFORMATION

### Rapid Decomposition and Visualisation of Protein-Ligand Binding Free Energies by Residue and by Water

Christopher J. Woods, Maturios Malaisree, Julien Michel, Ben Long,  
Simon McIntosh-Smith and Adrian J. Mulholland

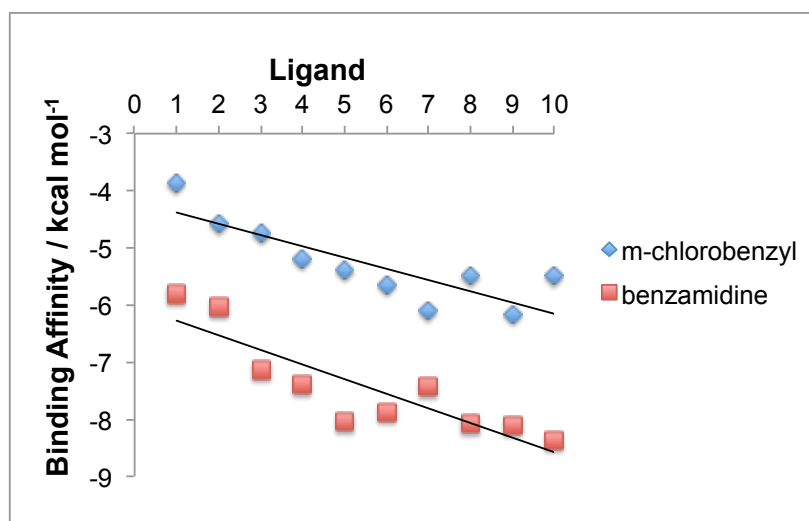

Figure S1. Experimentally measured binding affinities for the 10 ligands studied in this work (m-chlorobenzyl) and for the ten benzamidine analogs. Binding affinities are taken from Muley et al., doi: 10.1021/jm9016416 (reference 32 in our paper).

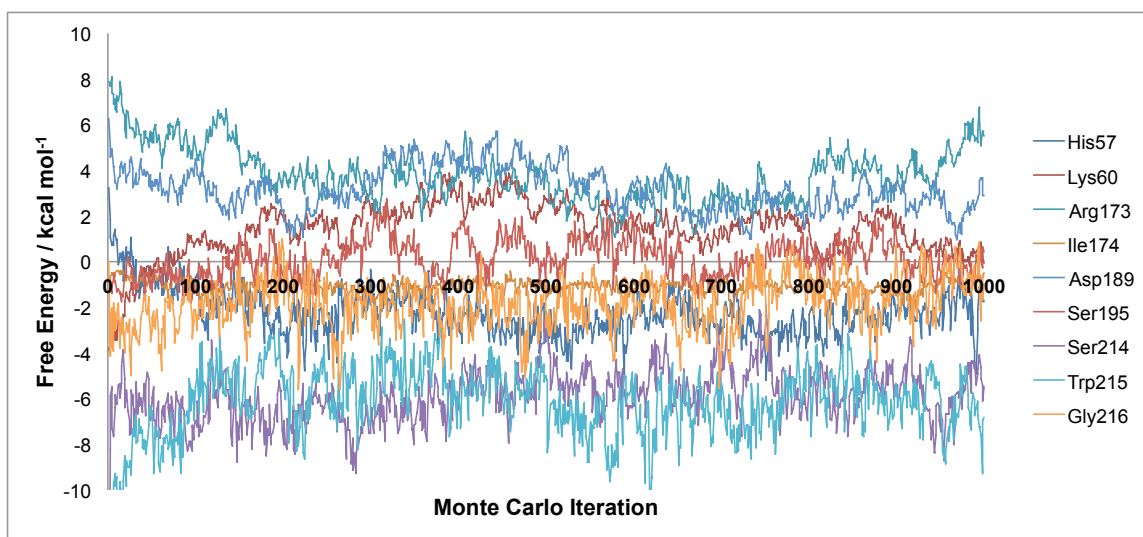

Figure S2. Components of the waterswap free energy for selected residues as calculated using averages calculated over individual Monte Carlo iterations for the 20 ns snapshot of ligand 9 bound to thrombin.
